# Supplementary material
Source: PubMed Central journal article supplement (PMC532020)
Supplement: mbc_E04-05-0414_1.pdf [file mbc_E04-05-0414_1.pdf]

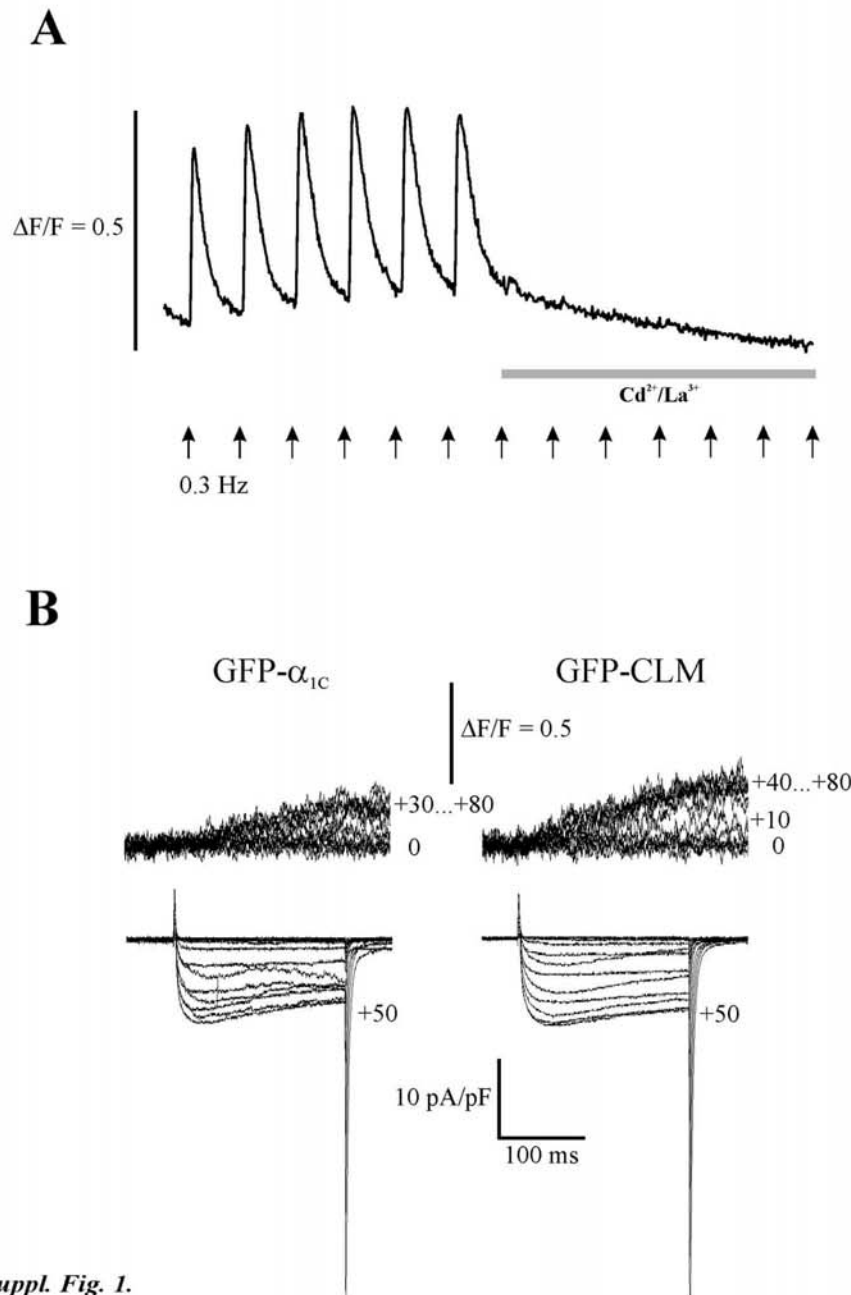

**Suppl. Fig. 1.**

Restoration of intracellular  $\text{Ca}^{2+}$  release and  $\text{Ca}^{2+}$  currents following expression of chimera GFP-CLM in dysgenic myotubes. *A*) Field stimulation experiments (40 V, 10 ms, 0.3 Hz) evoked rapid intracellular  $\text{Ca}^{2+}$  transients in dysgenic myotubes expressing GFP-CLM.  $\text{Ca}^{2+}$  release was blocked by bath application of 0.5 mM  $\text{Cd}^{2+}$  / 0.1 mM  $\text{La}^{3+}$ , thus demonstrating cardiac-type ( $\text{Ca}^{2+}$  dependent) EC coupling (compare to Figs. 3B and 3C of Kasielke et al., 2003). Immediate  $\text{Cd}^{2+}/\text{La}^{3+}$  block was observed in all of the 80 fluorescing cells examined. Arrows indicate pulse stimulations; the gray bar indicates  $\text{Cd}^{2+}/\text{La}^{3+}$  application. *B*) Simultaneous recordings of depolarization-induced  $\text{Ca}^{2+}$  transients (upper) and whole-cell  $\text{Ca}^{2+}$  currents (lower) from myotubes expressing GFP- $\alpha_{1C}$  and GFP-CLM revealed comparable macroscopic characteristics from both constructs. Step depolarizations from -50 to +80 mV were applied in 10 mV increments (200-ms test pulses) from a holding potential of -80 mV. Electrophysiological recordings and subsequent analysis was performed as previously described (Kugler et al., 2004).
